# Supplementary material for: N6-Methyladenosine Landscape of Glioma Stem-Like Cells: METTL3 Is Essential for the Expression of Actively Transcribed Genes and Sustenance of the Oncogenic Signaling
Source: MDPI journal article supplement (doi:10.3390/genes10020141), 2019-02-13
Supplement: s1 [file s1]

## **Supplementary information (Visvanathan et al., 2018)**

|                                     |          |
|-------------------------------------|----------|
| <b>Supplementary figure legends</b> | <b>2</b> |
|-------------------------------------|----------|

|                             |          |
|-----------------------------|----------|
| <b>Supplementary figure</b> | <b>8</b> |
|-----------------------------|----------|

## Supplementary figure legends

### Supplementary Figure 1. m6A peak distribution

**A.** The percentage of methylated genes that carry 1, 2, 3 or 4+ peaks per gene was plotted. Most methylated genes carry only one m6A peak. **B.** Correlation analysis between m6A peak enrichment score in shNT-GSCs and number of m6A consensus sites of genes is depicted as scatter plot. P value >0.05. **C.** Percentage reduction in the m6A peaks post METTL3 silencing at different segments of transcript. **D.** Peak density distribution of m6A modification 1000 bases up- and downstream of stop codon. **E.** Pie chart presenting the fraction for various types of RNAs differentially regulated with significance post-METTL3 silencing. The various types included are Protein-coding RNAs, lncRNA, Pseudogenes, snRNAs, snoRNAs, miRNAs and other RNAs. The lncRNA includes lincRNA, macro-lncRNA, bidirectional promoter lncRNA, sense\_intronic and sense\_overlapping. Pseudogenes includes pseudogene, processed pseudogenes, polymorphic pseudogenes, transcribed processed pseudogenes, transcribed unprocessed pseudogenes, transcribed unitary pseudogenes, unitary pseudogenes, unprocessed pseudogenes, TR\_V pseudogene and IG\_V pseudogene. Other RNAs include scaRNA, antisense, IG\_V\_gene, IG\_C\_gene, TR\_V\_gene, rRNA, TR\_C\_gene, TR\_J\_gene, processed transcript, misc\_RNA, 3'\_overlapping\_ncRNA, to be experimentally confirmed and noncoding RNAs. **F.** Scatter plot for number of peak per gene showing negative correlation with differential transcript regulation post METTL3 silencing. Genes with high number of peaks show down-regulation after METTL3 inhibition.

## Supplementary Figure 2. GSC specific histone activated genes relate to METTL3 direct targets

**A.** GSEA enrichment plots showing a negative enrichment of ACTIVE\_ON\_GSC\_NSC gene set in METTL3 regulated direct targets (shMETTL3-shNT). This gene set consists of genes that are activated by H3K4me3 (active mark) in MGG8 GSCs but repressed by H3K27me (repression mark) or a bivalent mark (repression mark) in NSCs. **B.** The normalized read counts of transcripts (shNT-GSC and shMETTL3-GSC) that were enriched for ACTIVE\_ON\_GSC\_NSC gene set is depicted as heat map. Red and green denotes high and low expression respectively. Note that the majority of genes of this gene set are downregulated in METTL3 silenced GSCs. **C.** GSEA enrichment plots showing a negative enrichment of ACTIVE\_ON\_GSC\_DGC gene set in METTL3 regulated direct targets (shMETTL3-shNT). This gene set consists of genes that are activated by H3K4me3 (active mark) in MGG8 GSCs but repressed by H3K27me (repression mark) or a bivalent mark (repression mark) in MGG8 DGCs. **D.** The normalized read counts of genes (shNT-GSC and shMETTL3-GSC) that were enriched for ACTIVE\_ON\_GSC\_DGC gene set is depicted as heat map. Red and green denotes high and low expression respectively. Note that the majority of genes of this gene set are downregulated in METTL3 silenced GSCs. **E.** GSEA enrichment plots showing negative significant enrichment of ACTIVE\_ON\_GSC\_DGC\_H3K27AC gene set in METTL3 regulated direct targets (shMETTL3-shNT). This gene set consists of genes that are activated by H3K27Ac in MGG8 GSCs and lost in MGG8 DGCs. **F.** The normalized read counts of genes (shNT-GSC and shMETTL3-GSC) that were enriched for ACTIVE\_ON\_GSC\_DGC\_H3K27AC was depicted as heat map. Red and green denotes high and low expression respectively. Note that the majority of genes of this gene set are downregulated in METTL3 silenced GSCs

### **Supplementary Figure 3. GSC specific histone activated genes relate to METTL3 indirect targets**

**A.** GSEA enrichment plots showing a negative enrichment of ACTIVE\_ON\_GSC\_NSC gene set in METTL3 regulated indirect targets (shMETTL3-shNT). This gene set consists of genes that are activated by H3K4me3 (active mark) in MGG8 GSCs but repressed by H3K27me (repression mark) or a bivalent mark (repression mark) in NSCs. **B.** The normalized read counts of genes (shNT-GSC and shMETTL3-GSC) that were enriched for ACTIVE\_ON\_GSC\_NSC gene set is depicted as heat map. Red and green denotes high and low expression respectively. Note that the majority of genes of this gene set are downregulated in METTL3 silenced GSCs. **C.** GSEA enrichment plots showing a negative enrichment of ACTIVE\_ON\_GSC\_DGC gene set in METTL3 regulated indirect targets (shMETTL3-shNT). This gene set consists of genes that are activated by H3K4me3 (active mark) in MGG8 GSCs but repressed by H3K27me (repression mark) or a bivalent mark (repression mark) in MGG8 DGCs. **D.** The normalized read counts of genes (shNT-GSC and shMETTL3-GSC) that were enriched for ACTIVE\_ON\_GSC\_DGC gene set is depicted as heat map. Red and green denotes high and low expression respectively. Note that the majority of genes of this gene set are downregulated in METTL3 silenced GSCs. **E.** GSEA enrichment plots showing negative significant enrichment of ACTIVE\_ON\_GSC\_DGC\_H3K27AC gene set in METTL3 regulated indirect targets (shMETTL3-shNT). This gene set consists of genes that are activated by H3K27Ac in MGG8 GSCs and lost in MGG8 DGCs. **F.** The normalized read counts of genes (shNT-GSC and shMETTL3-GSC) that were enriched for ACTIVE\_ON\_GSC\_DGC\_H3K27AC was depicted as heat map. Red and green denotes high and low expression respectively. Note that the majority of genes of this gene set are downregulated in METTL3 silenced GSCs

### **Supplementary Figure 4. Distribution of METTL3 dependent RNA editing events**

**A.** The event distribution of all editing events across Alu, non-Alu and non-Alu-non repeats segments for shNT and shMETTL3 conditions were depicted as pie diagram. The area of diagram represents the total number of events. **B.** The

event distribution of all editing events across different RNA segments for shNT and shMETTL3 conditions were depicted as pie diagram. The area of diagram represents the total number of events. **C.** The event distribution of all editing events across different RNA segments in shNT and shMETTL3 conditions were depicted as bar graph. The events in shNT were normalized to 100%. **D.** The amino acid alteration which leads to synonymous and non-synonymous editing events in shNT and shMETTL3 cells is plotted. **E.** Pie chart representing the rna editing events in ShNT MGG8 GSCs. The A-I event type include A-G and T-C events. C-U events include C-T and G-A events

### **Supplementary Figure 5. METTL3 and m6A modification in RNA processing**

**A.** Pathway analysis of all putative RBPs identified by RBPmap and the p value of enrichment are depicted. **B.** Pathway analysis of gene groups which show aberrant alternative splicing under exon skipping (SE), retained intron (RI) and alternative splice sites (A3'SS, A5'SS) categories. **C.** Cumulative distribution of genes which show overlapping m6A peaks with skipped exon coordinates were depicted for m6A modified genes compared to non-m6A genes.

### **Supplementary Figure 6. METTL3 regulate the exon skipping of MDM2**

The functional protein domains of MDM2 are presented. NLS, nuclear localization signal; NES, nuclear export signal; Zn-finger, zinc-finger domain; NoLS, nucleolar localization signal; RING-finger, ring-finger domain. Skipped exon events identified in shNT-GSCs that were lost in shMETTL3-GSCs were given below.

## Supplementary Figure 7. Regulation of lincRNAs and miRNAs by METTL3 in GSCs

**A.** Volcano plot representing lincRNAs regulated after METTL3 silencing (shMETTL3-shNT) was illustrated. The significant lincRNAs regulated were marked red (upregulated) and green (downregulated) dots. METTL3 silencing resulted in an overall upregulation of lincRNAs. **B.** Heat map depicting the differential regulation of lincRNAs between shNT and shMETTL3 GSCs in duplicates was shown. Red indicates high and green for low expression in the scale of 1.5 to -1.5. **C.** Cumulative fraction of absolute abundance of transcripts in FPKM is plotted for lincRNAs and protein coding genes. Protein coding genes is higher in abundance compared to lincRNAs. **D.** Cumulative fraction of absolute abundance of transcripts in FPKM is plotted for modified and unmodified protein coding genes and lincRNAs. m6A modified protein coding genes and lincRNAs expression is higher compared to protein coding genes and lincRNAs with no m6A peak. **E.** Cumulative fraction of fold change (shMETTL3-shNT) for protein coding genes and lincRNAs that are methylated or unmethylated was shown. Both methylated lincRNAs and protein-coding genes are significantly inhibited by METTL3 silencing compared to unmethylated transcripts after METTL3 silencing. **F.** m6A peak distribution for top direct lincRNA targets XIST, MALAT1 and H19 were shown in shNT and shMETTL3 conditions. Normalized sequence coverage of RIP was indicated above the gene architecture in UCSC format. Thick black boxes represent the coding sequences and thin lines represent introns. **G.** Heat map illustrating the differential regulated miRNAs between shNT and shMETTL3 GSCs in duplicate samples. Red indicates high and green for low expression with the scale of 2 to -2. **H.** The genes with m6A peaks at 3'UTR and downregulated post METTL3 silencing were analyzed for target miRNA binding sites within the peaks. Genes with maximum number of miRNA sites with m6A peaks were identified by target scan and the network was visualized by Cytoscape. miRNAs that are upregulated in GBM compared to control brain were marked red.

### **Supplementary Figure 8. Pathways regulated by direct and indirect METTL3 targets**

**A and B.** PANTHER pathways enriched in direct and indirect targets were plotted respectively. The top 10 pathway terms, which were enriched with significant p value of less than 0.05, were depicted.

### **Supplementary Figure 9. Regulation of NOTCH pathway by METTL3 mediated m<sup>6</sup>a modification**

**A.** Gene Set Enrichment Analysis (GSEA) was performed for genes which are regulated by METTL3 at transcript level with 2-fold regulation ( $p < 0.05$ ). The gene set - NGUYEN\_NOTCH1\_TARGETS\_UP is negatively enriched in METTL3 silenced GSCs. **B.**

Table representing the regulation of NOTCH pathway genes upon METTL3 silencing and the m<sup>6</sup>a modification .

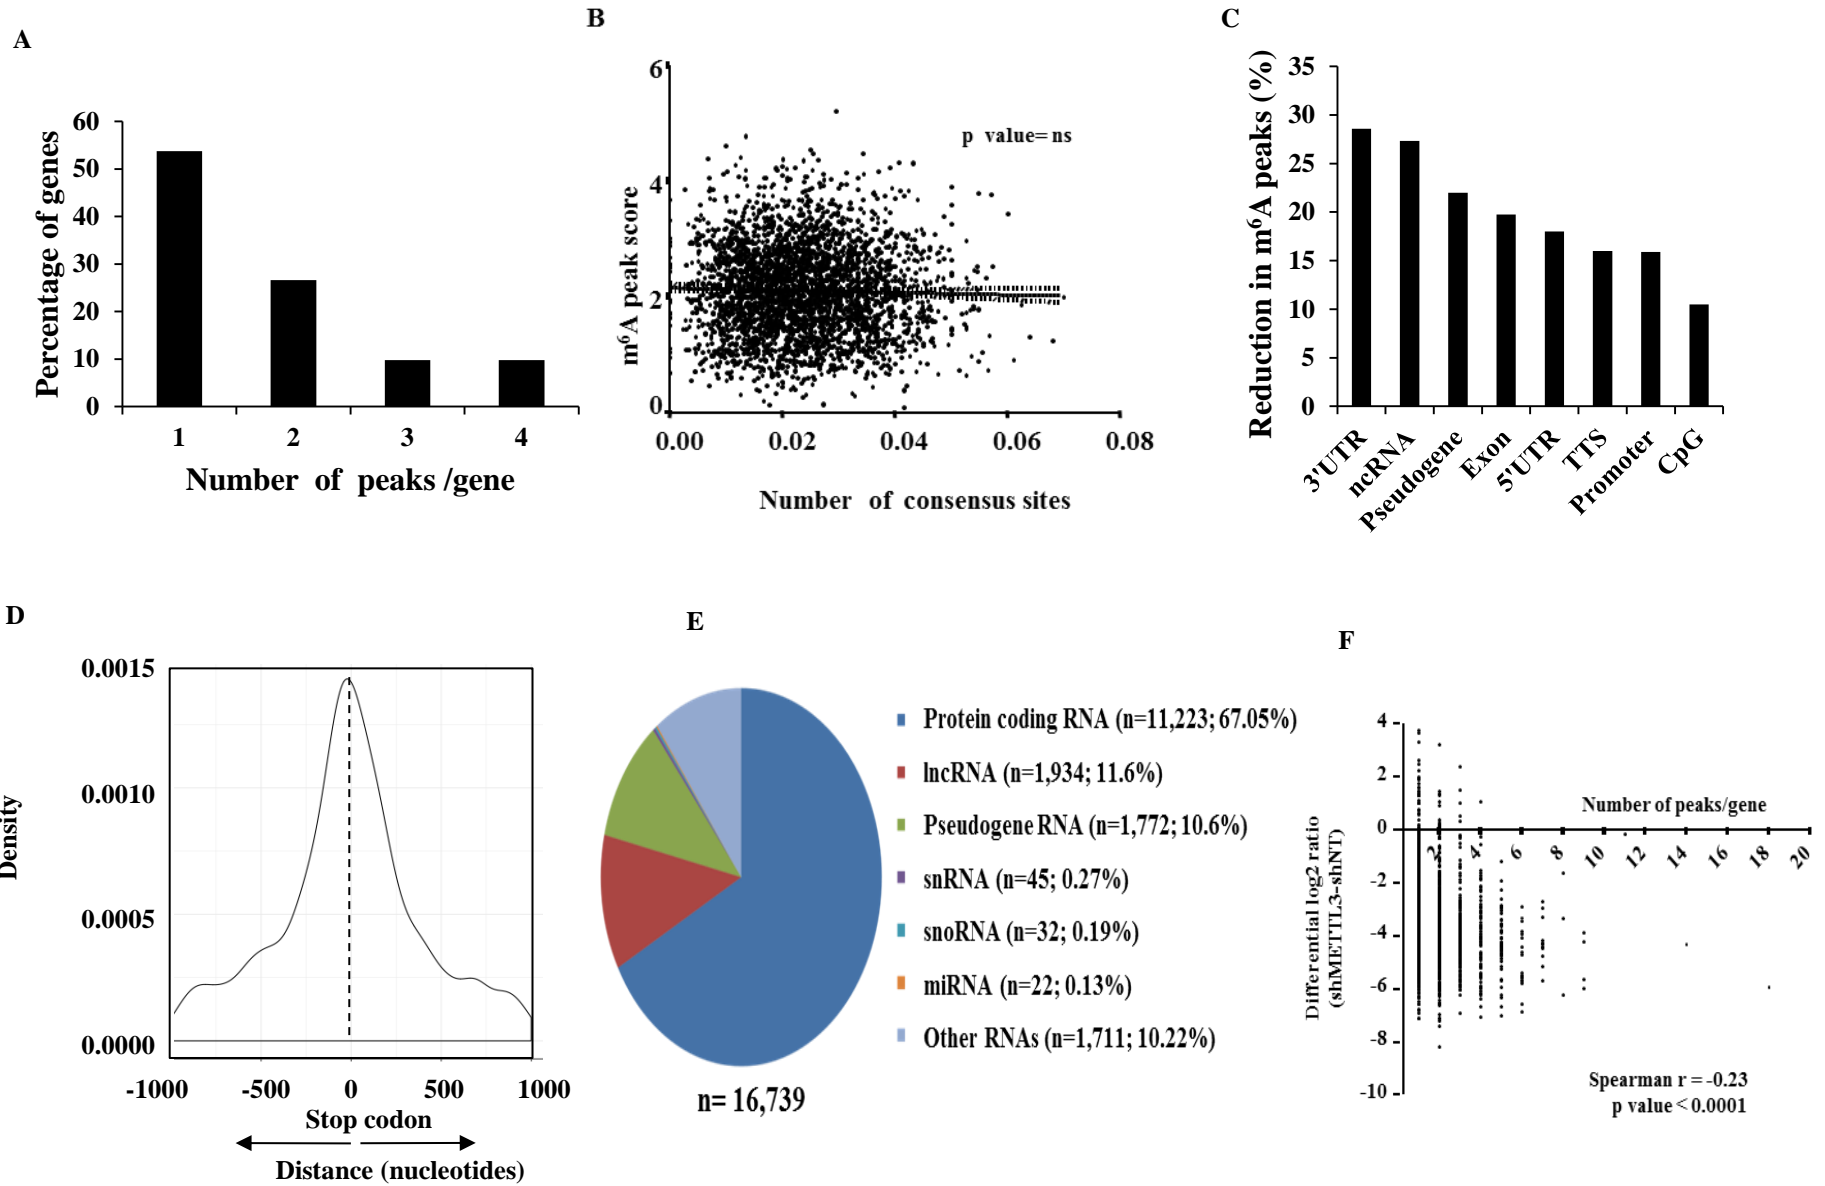

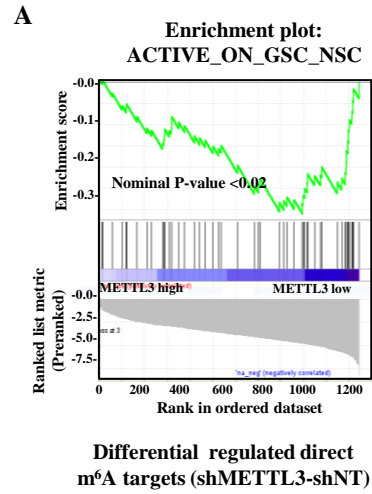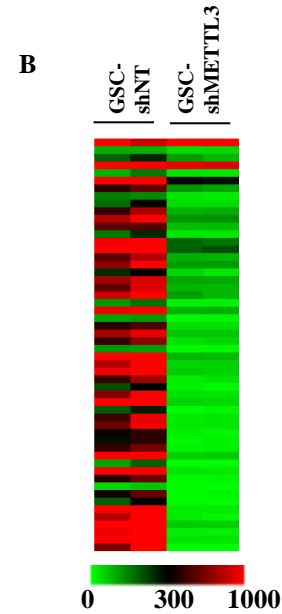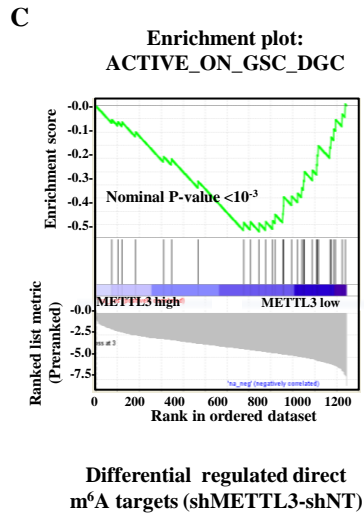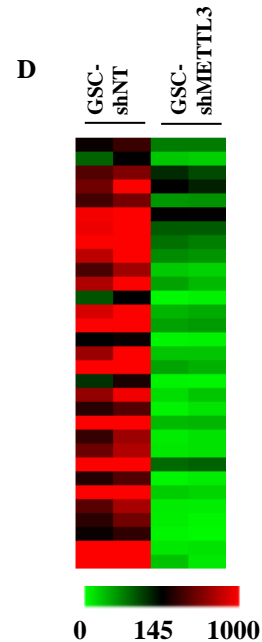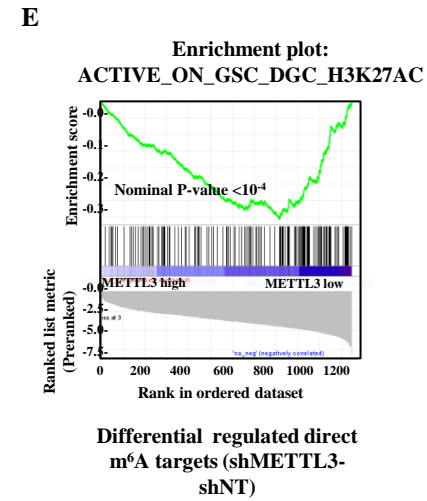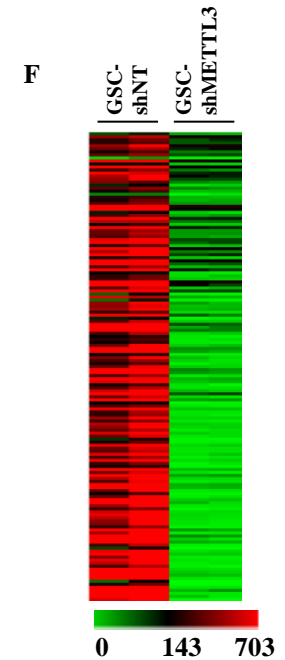

**A**

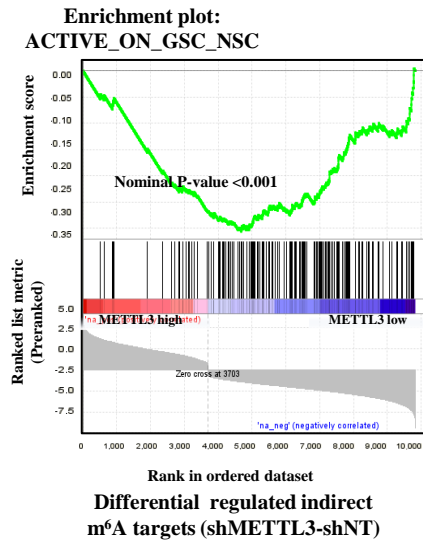

**B**

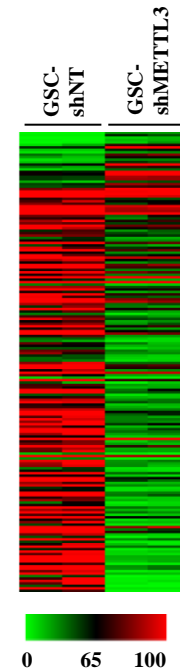

**C**

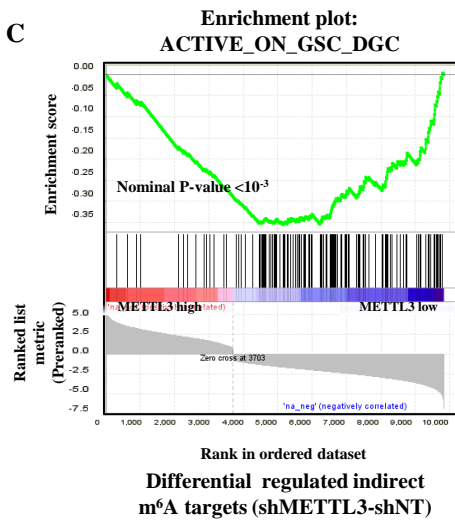

**D**

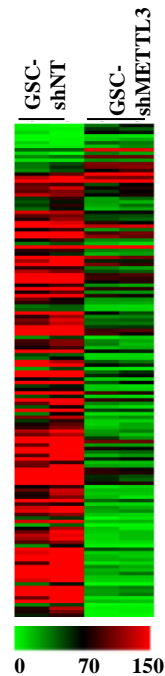

**E**

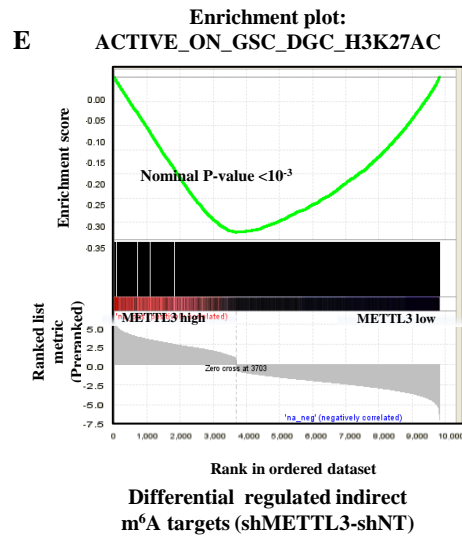

**F**

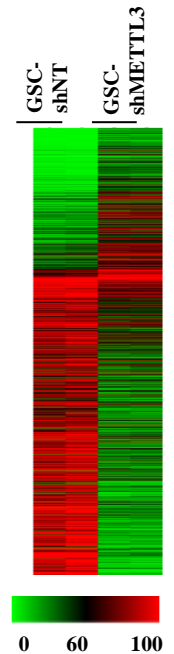

A

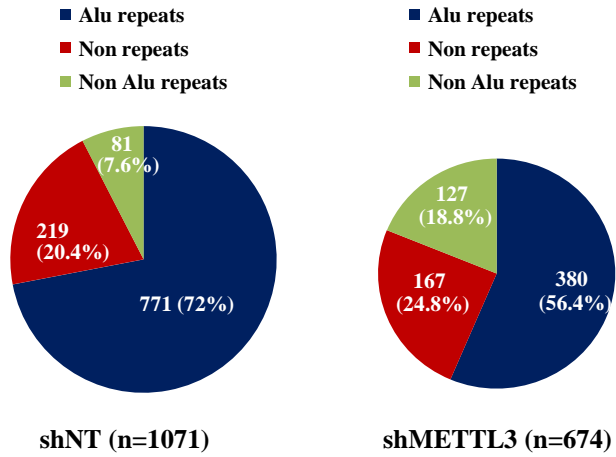

B

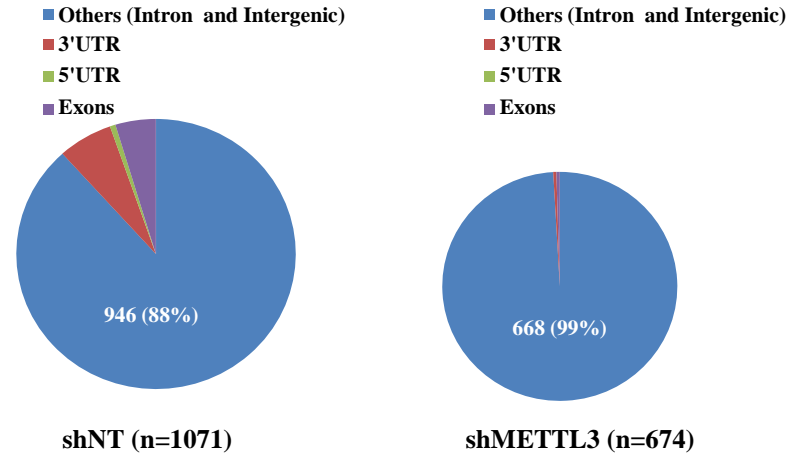

C

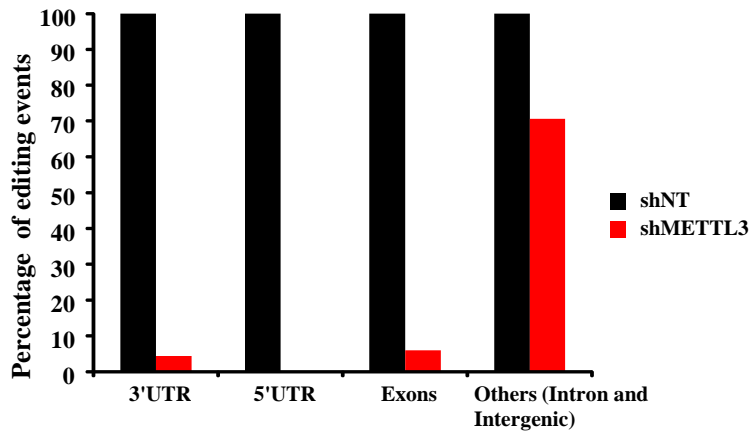

D

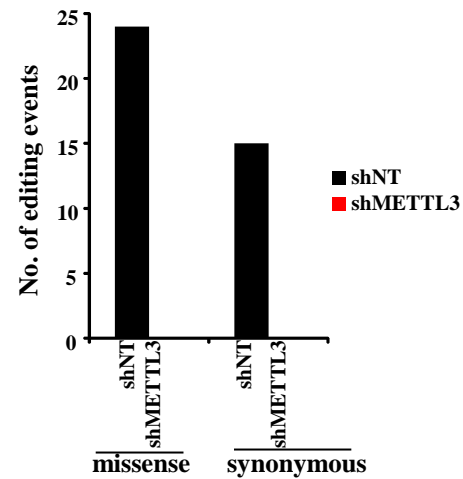

E

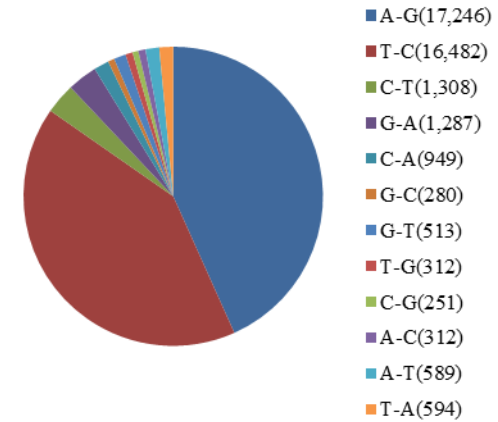

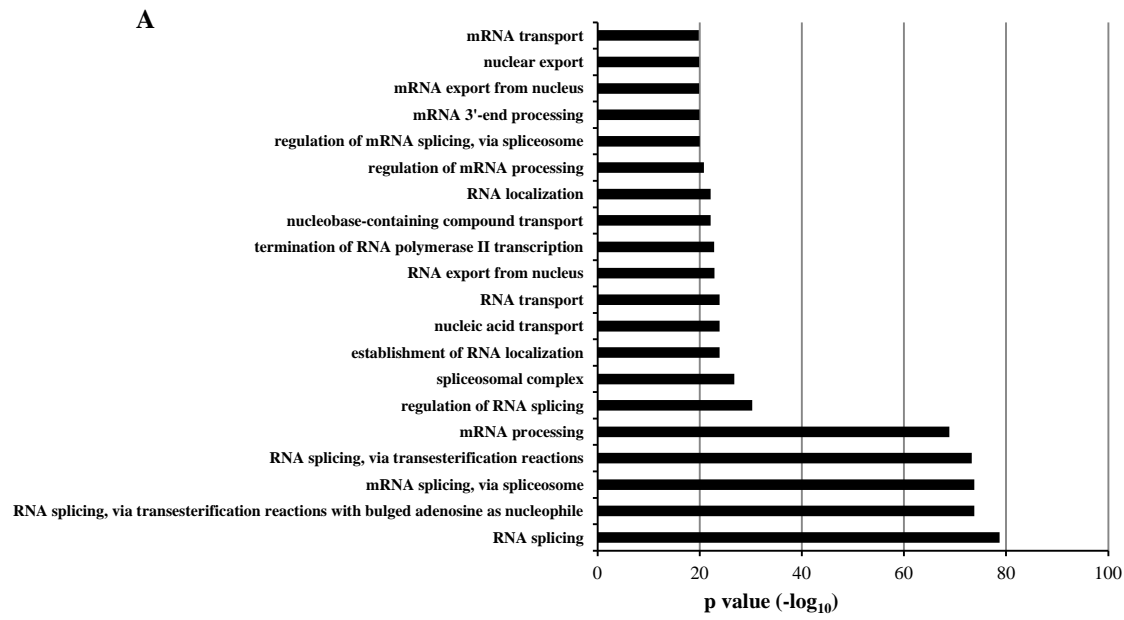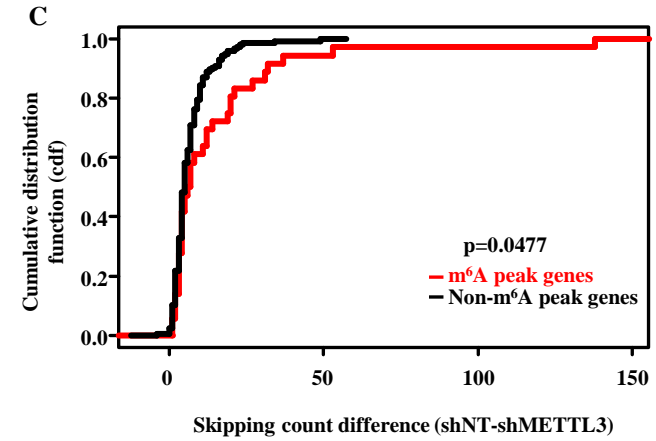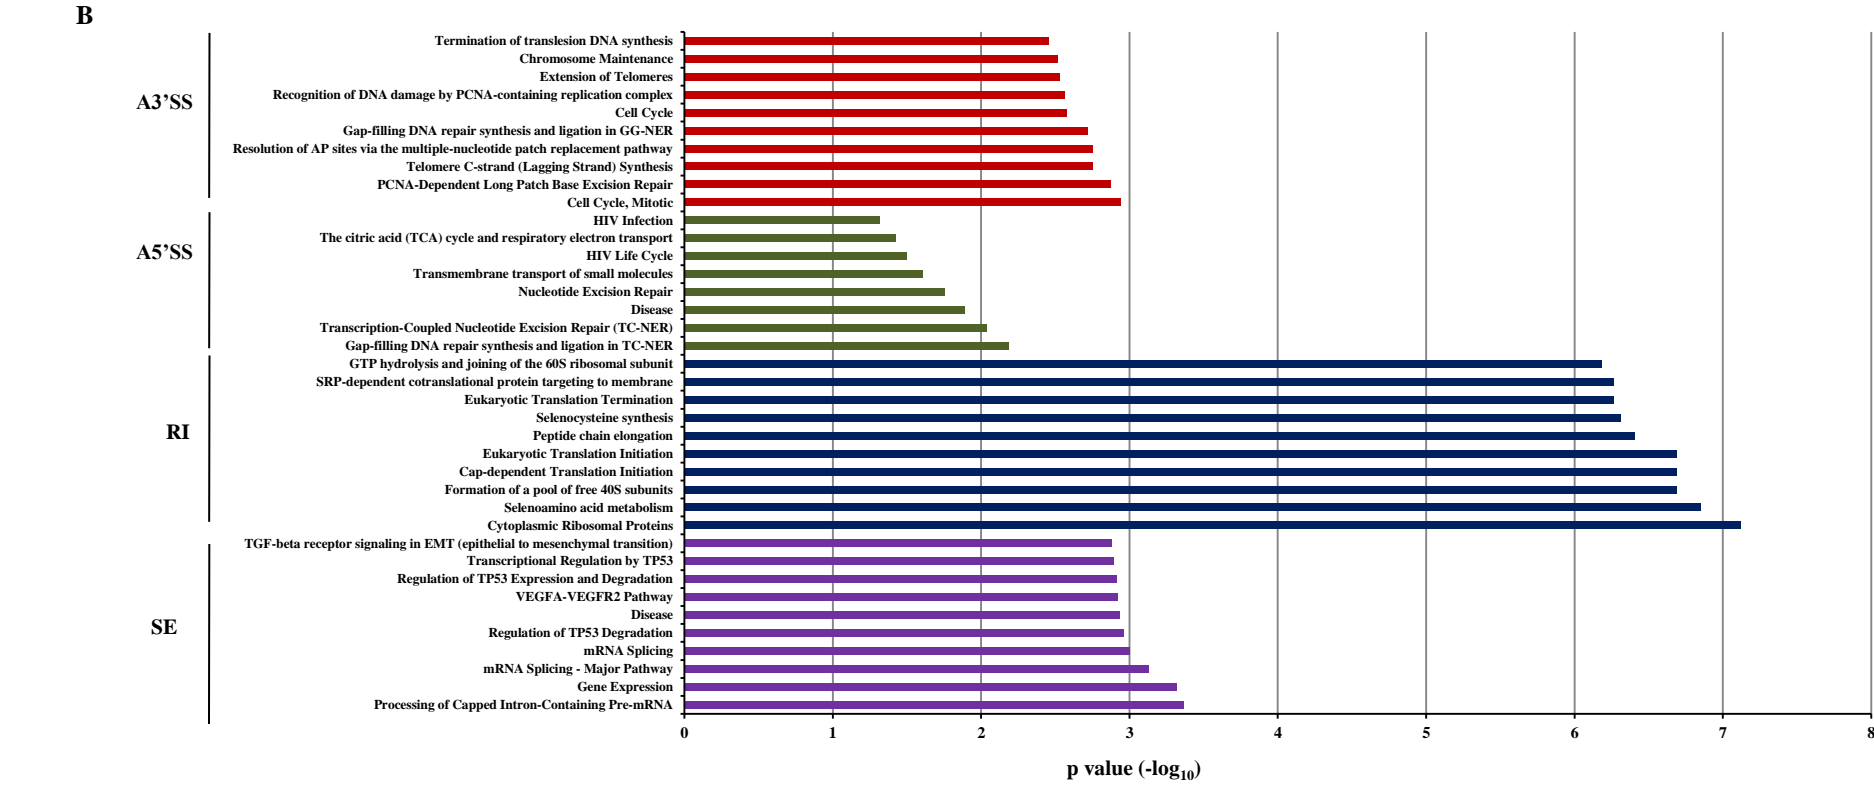

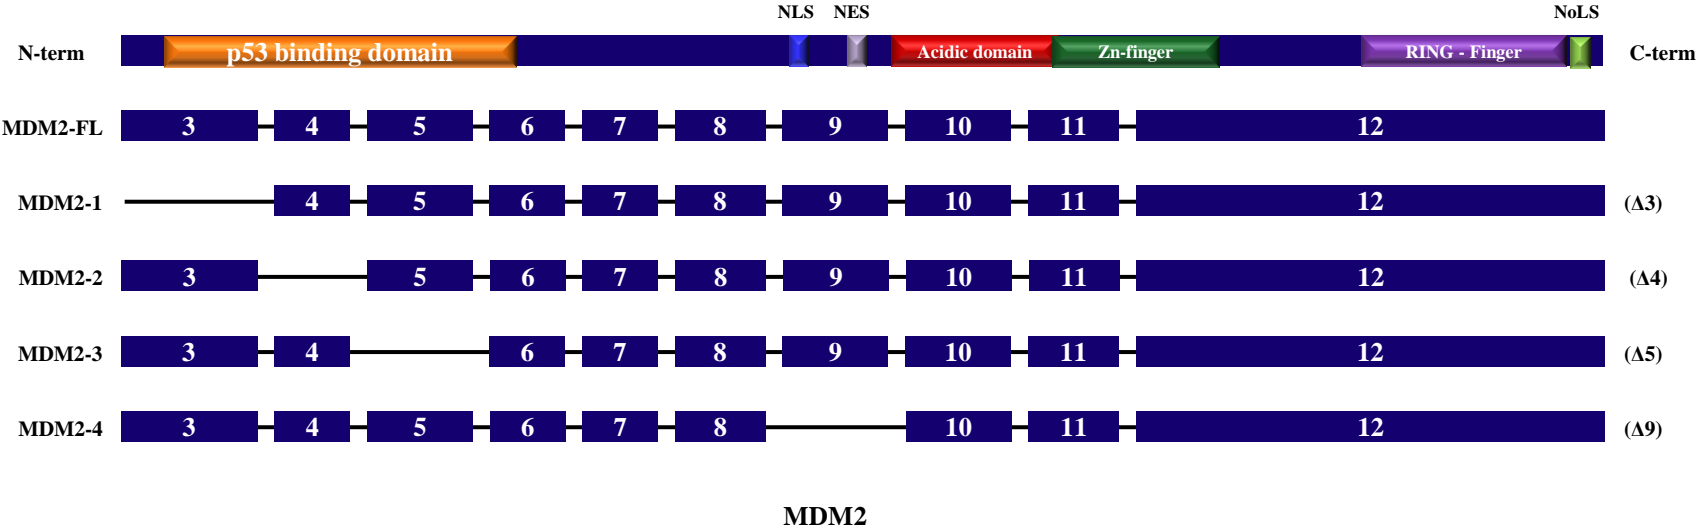

A

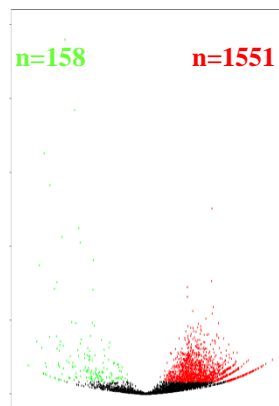

B

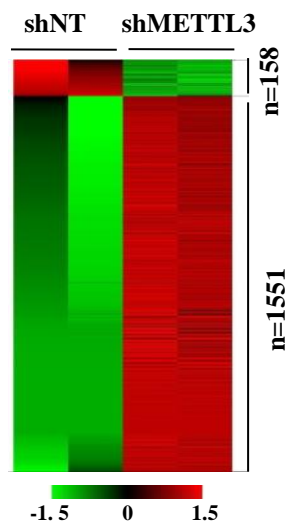

E

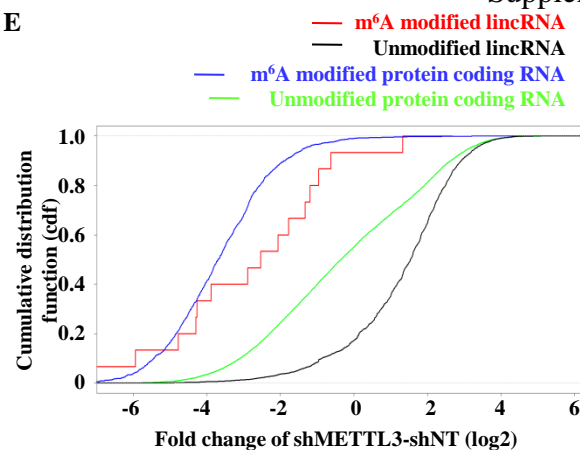

G

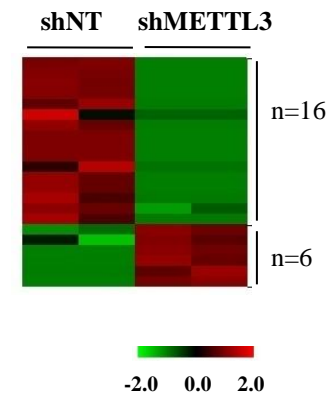

C

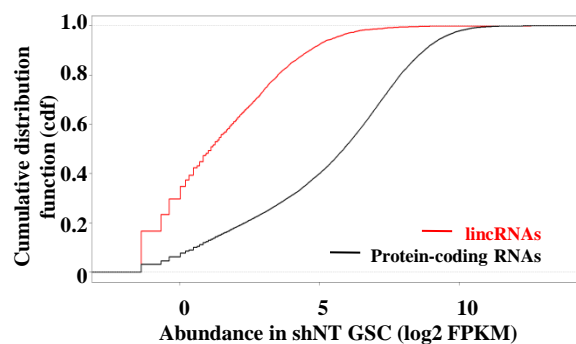

F

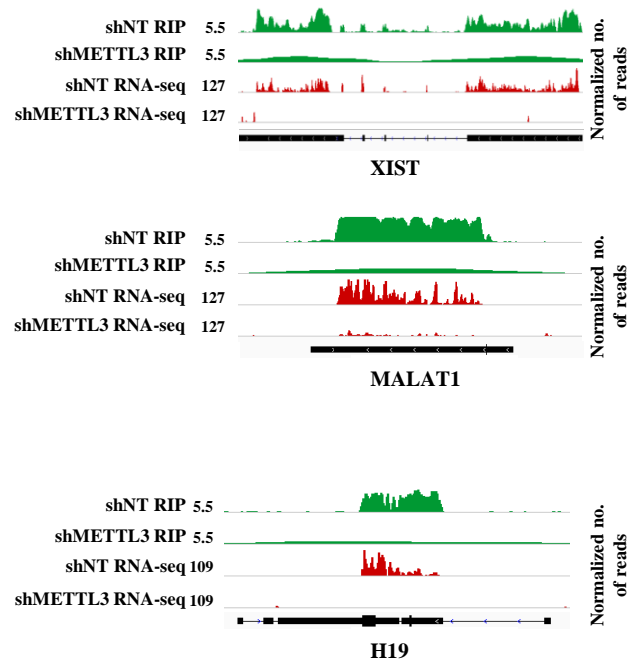

H

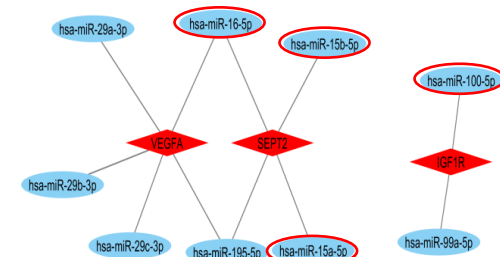

D

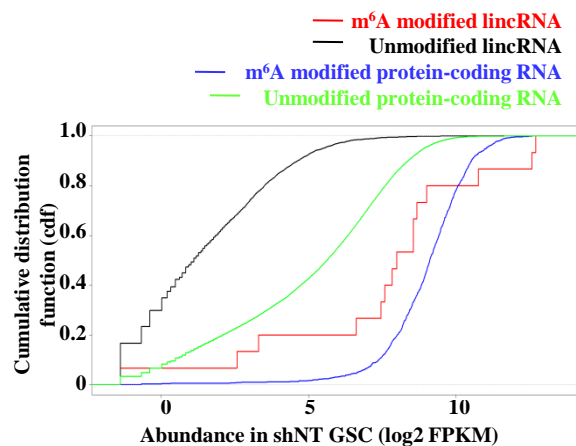

**A**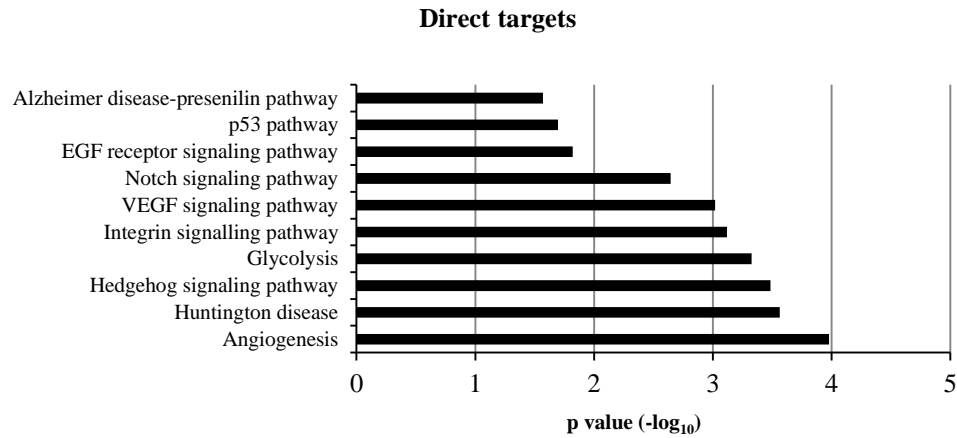**B**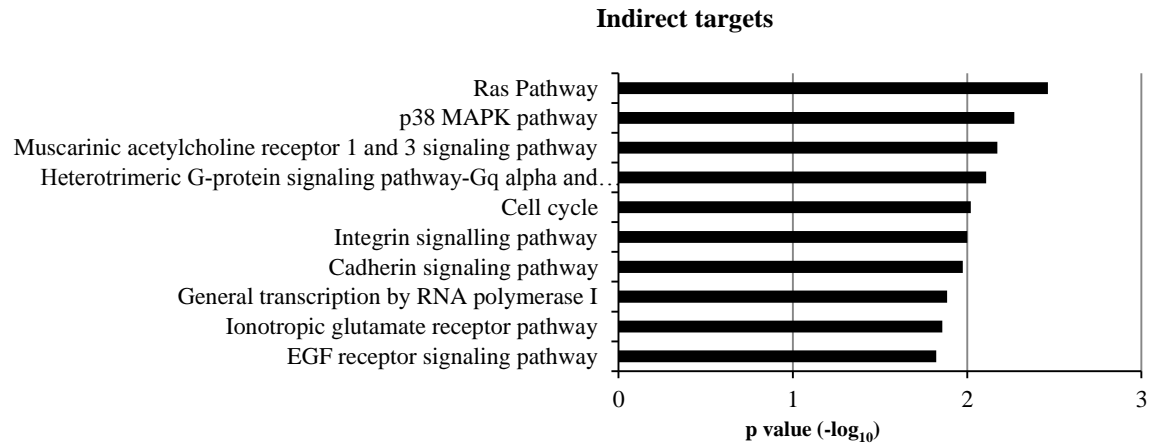

**A**

NGUYEN\_NOTCH1\_TARGETS\_UP

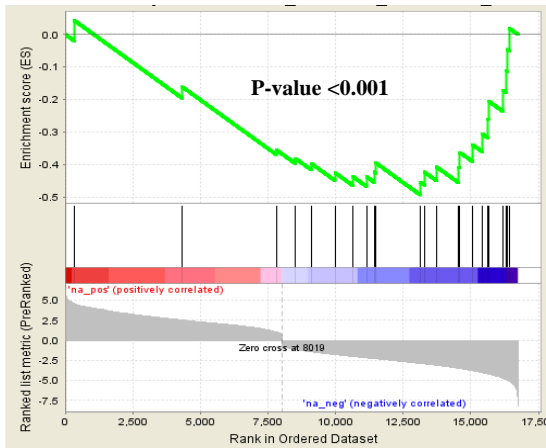**B**

## Regulation of Notch signaling by METTL3 dependent m6a modification

| Gene symbol | Differential expression log2 (shMETTL3-shNT) | p value  | p adj    | Number of m6a peaks in shNT GSC | Number of m6a peaks in shMETTL3 GSC |
|-------------|----------------------------------------------|----------|----------|---------------------------------|-------------------------------------|
| DLL1        | -4.87718                                     | 1.34E-16 | 2.53E-15 | 1                               | 0                                   |
| DLL3        | -4.98771                                     | 2.36E-27 | 1.04E-25 | 2                               | 0                                   |
| DLL4        | 1.181379                                     | 0.119828 | 0.187499 | 0                               | 0                                   |
| JAG1        | -2.66791                                     | 4.21E-15 | 7.05E-14 | 0                               | 0                                   |
| JAG2        | -4.00343                                     | 3.75E-25 | 1.4E-23  | 1                               | 0                                   |
| Notch1      | -5.20051                                     | 6.78E-50 | 1.91E-47 | 2                               | 0                                   |
| Notch2      | -4.25615                                     | 5.38E-45 | 1.05E-42 | 1                               | 0                                   |
| Notch3      | -3.91067                                     | 2.95E-34 | 2.35E-32 | 2                               | 0                                   |
| Notch4      | 1.374536                                     | 0.00036  | 0.001511 | 0                               | 0                                   |
| HES1        | -3.5254                                      | 1.88E-12 | 2.54E-11 | 1                               | 0                                   |
